# Supplementary material for: Self-deposition of Pt nanocrystals on Mn3O4 coated carbon nanotubes for enhanced oxygen reduction electrocatalysis
Source: Royal Society of Chemistry journal article supplement (doi:10.1039/c3ta10298j), 2013-01-01

Electronic Supplementary Information (ESI) for

## Self-deposition of Pt nanocrystals on $\text{Mn}_3\text{O}_4$ coated carbon nanotubes for enhanced oxygen reduction electrocatalysis

Yu-Ping Xiao,<sup>a, b, ‡</sup> Wen-Jie Jiang,<sup>a, b, ‡</sup> Shuo Wan,<sup>c</sup> Xing Zhang,<sup>a</sup> Jin-Song Hu,<sup>\*a</sup>  
Zi-Dong Wei,<sup>\*b</sup> and Li-Jun Wan<sup>a</sup>

<sup>a</sup> Key Laboratory of Molecular Nanostructure and Nanotechnology, Beijing National Laboratory for Molecular Sciences, Institute of Chemistry, Chinese Academy of Sciences, Beijing 100190, China. Fax: +86 10 82613929; Tel: +86 10 82613929; E-mail: [hujis@iccas.ac.cn](mailto:hujis@iccas.ac.cn)

<sup>b</sup> The State Key Laboratory of Power Transmission Equipment & System Security and New Technology, College of Chemistry and Chemical Engineering, Chongqing University, Chongqing, 400044, China. E-mail: [zdwei@cqu.edu.cn](mailto:zdwei@cqu.edu.cn)

<sup>c</sup> College of Chemistry and Chemical Engineering, Xiamen University, Xiamen 361005, China

**Figure S1.** XRD pattern of pure carbon nanotubes.

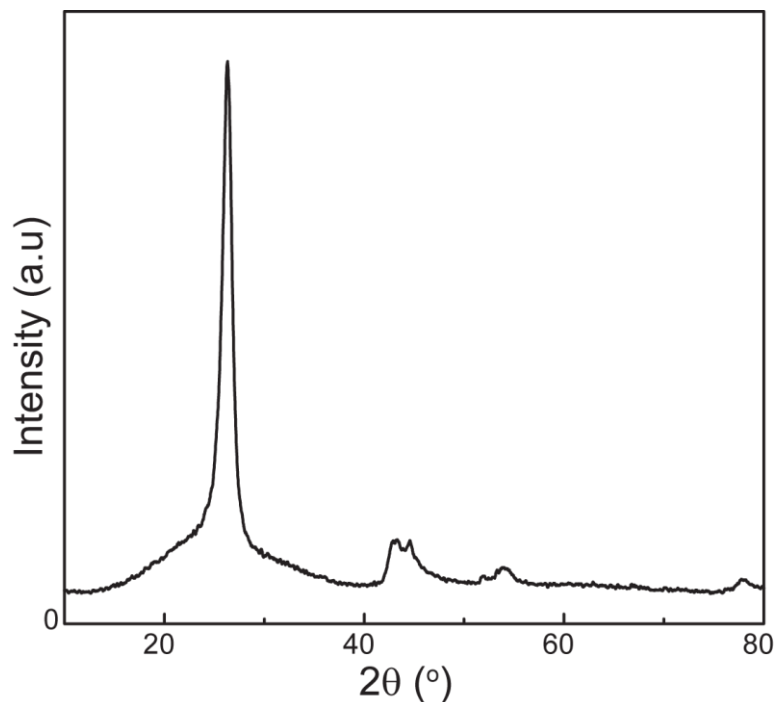

**Figure S2.** Energy dispersed spectrum (EDS) of  $\text{Mn}_3\text{O}_4/\text{CNTs}$ , taken on catalysts dispersed on TEM grid.

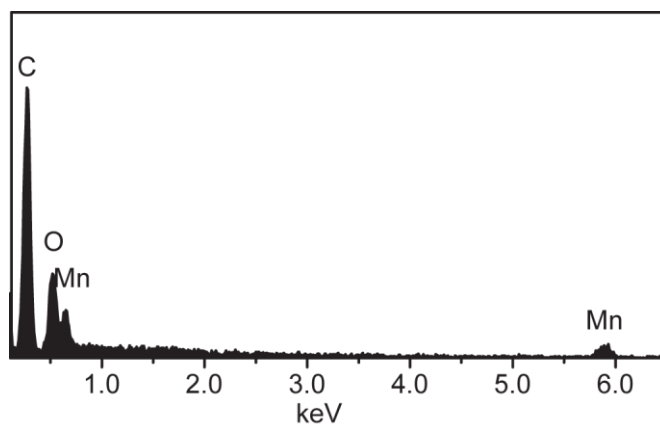

**Figure S3.** Energy dispersed spectrum (EDS) of  $\text{Pt}/\text{Mn}_3\text{O}_4/\text{CNTs}$ , taken on catalysts dispersed on Si. Si signal is from Si substrate for SEM.

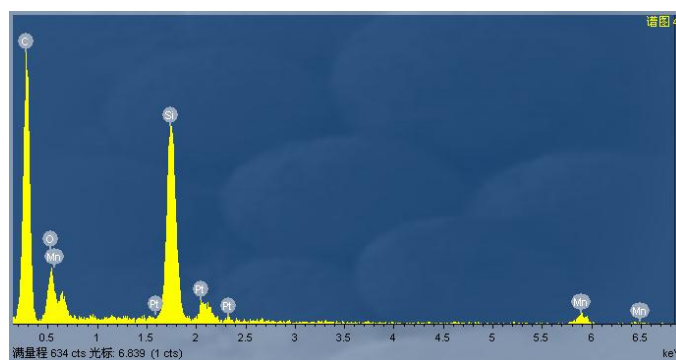

**Figure S4.** The size distribution histogram of Pt nanocrystals in  $\text{Pt}/\text{Mn}_3\text{O}_4/\text{CNTs}$ .

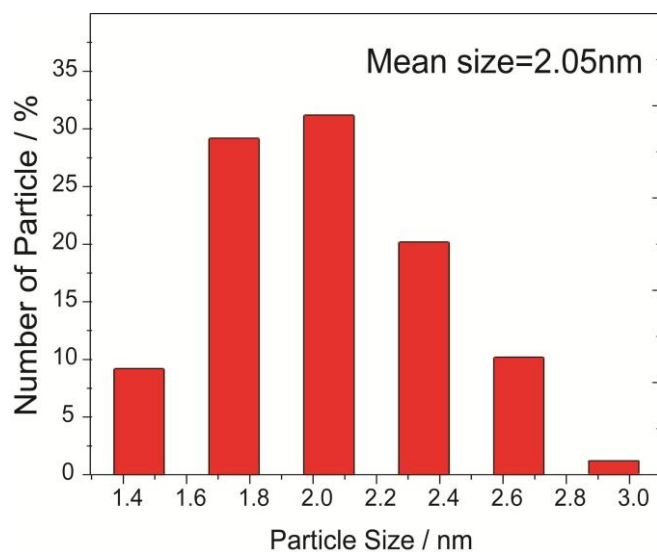

Supplement: c3ta10298j.pdf [file c3ta10298j.pdf]
